# Supplementary material
Source: ML conference proceedings conference paper supplement (https://openaccess.thecvf.com/content/WACV2025/html/Van_Holland_NeRFs_are_Mirror_WACV_2025_paper.html)
Supplement: Supplementary file 1 [file Van_Holland_NeRFs_are_Mirror_WACV_2025_supplemental.zip]

# NeRFs are Mirror Detectors: Using Structural Similarity for Multi-View Mirror Scene Reconstruction with 3D Surface Primitives – *Supplementary Material* –

Leif Van Holland<sup>1</sup> Michael Weinmann<sup>2</sup> Jan U. Müller<sup>1</sup> Patrick Stotko<sup>1</sup> Reinhard Klein<sup>1</sup>  
<sup>1</sup>University of Bonn <sup>2</sup>Delft University of Technology  
holland@cs.uni-bonn.de m.weinmann@tudelft.nl {muellerj, stotko, rk}@cs.uni-bonn.de

| Hyperparameter                 | Value                   |
|--------------------------------|-------------------------|
| Scoring                        |                         |
| SSIM window size               | 31                      |
| $c_1$                          | $1 \times 10^{-4}$      |
| $c_2$                          | $9 \times 10^{-4}$      |
| $c$                            | 10                      |
| $S$                            | $0.5 \cdot \max_r s(r)$ |
| Shape Fitting                  |                         |
| normal estimate k-neighbors    | 100                     |
| normal estimate search radius  | 0.5                     |
| clustering k-means #iterations | $1 \times 10^5$         |
| RANSAC distance threshold      | $5 \times 10^{-3}$      |
| RANSAC #iterations             | $2 \times 10^5$         |
| Joint Optimization             |                         |
| $\tau_{\text{init}}$           | $1 \times 10^3$         |
| $\tau_{\text{inc}}$            | $1 \times 10^5$         |
| $\tau_{\text{std}}$            | $2 \times 10^5$         |

Table 1. Hyperparameter choices.

## A. Hyperparameters

Tab. 1 shows the set of hyperparameters that were used throughout all synthetic and real world scenes in our evaluation, categorized into the different steps of the pipeline they are used in.

## B. Additional Results

In Fig. 1, we show results on each of the scenes we selected from the TraM-NeRF dataset for evaluation.

Tab. 2 additionally reports the intersection over union (IoU) and  $F_1$  score of the high-quality, manually annotated masks from the TraM-NeRF dataset compared to the masks produced by our automated approach after the final opti-

| Scene         | IoU [%] | $F_1$ score |
|---------------|---------|-------------|
| scene_1       | 98.8    | 0.994       |
| scene_2       | 98.6    | 0.993       |
| scene_3       | 98.6    | 0.993       |
| scene_4       | 98.7    | 0.993       |
| scene_5       | 98.6    | 0.993       |
| scene_tram    | 0.0     | 0.000       |
| scene_trumpet | 98.2    | 0.991       |
| scene_hallway | 90.7    | 0.931       |
| scene_library | 96.7    | 0.983       |

Table 2. Mask overlap between the high quality annotations provided with the TraM-NeRF dataset and masks our automatic approach produces after training. Measured are intersection over union (IoU) and the  $F_1$  score.

mization. More specifically, the masks are rendered from all cameras in the test dataset and the metrics are evaluated on the resulting binary images and averaged over the views.

It can be seen that our approach gets close to the annotation data, but falls back to a standard NeRF reconstruction on “scene\_tram”, which corresponds to the failure case we have shown in the main paper.

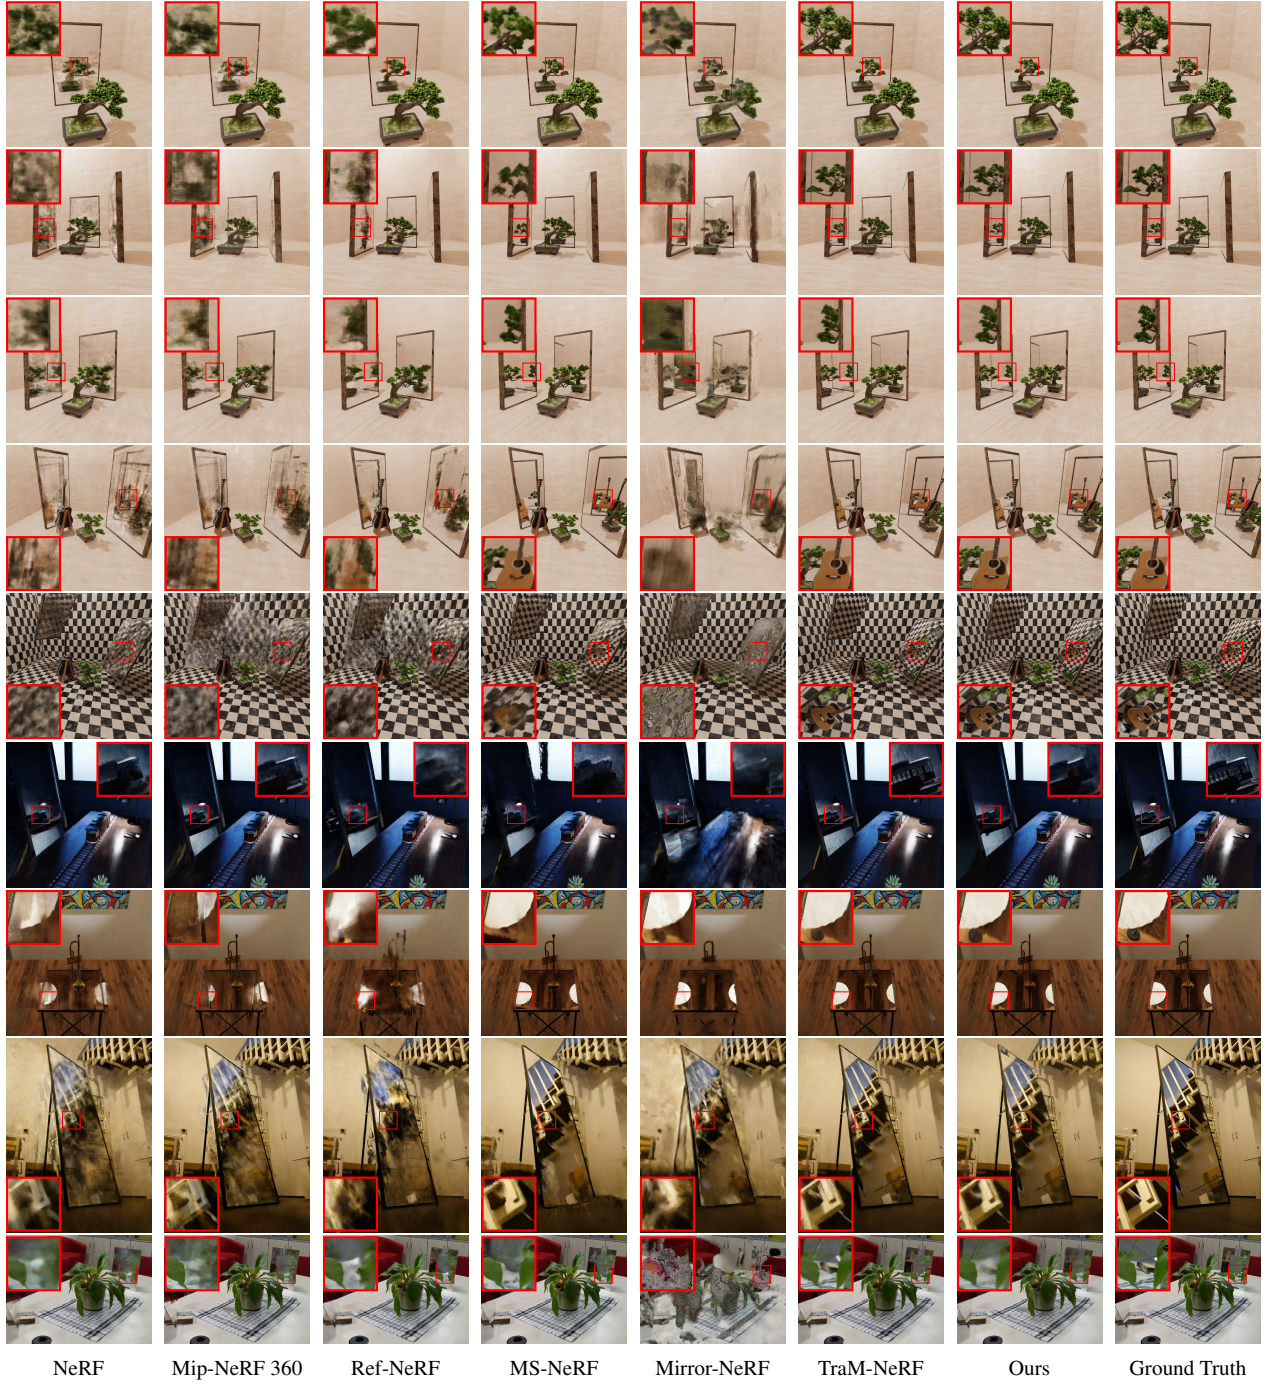

Figure 1. Reconstruction results of our method compared to previous methods on the subset of the Tram-NeRF dataset we selected. Rows 1-7 show synthetic scenes, while rows 8 and 9 show real world scenes. The last column represents the ground truth image from the test set. The rows are in the same order as listed in Table 2.
